# Supplementary material for: Relocation of earthquakes in the southern and eastern Alps (Austria, Italy) recorded by the dense, temporary SWATH-D network using a Markov chain Monte Carlo inversion
Source: Copernicus journal article supplement (doi:10.5194/se-12-1087-2021), 2021-05-19
Supplement: Supplementary file 1 [file se-12-1087-2021-supplement.zip]

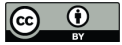

*Supplement of*

**Relocation of earthquakes in the southern and eastern Alps (Austria, Italy) recorded by the dense, temporary SWATH-D network using a Markov chain Monte Carlo inversion**

**Azam Jozi Najafabadi et al.**

*Correspondence to:* Azam Jozi Najafabadi (azam@gfz-potsdam.de)

- se-12-1087-2021-supplement-title-page.pdf
- S1.xlsx
- S2.xlsx

The copyright of individual parts of the supplement might differ from the article licence.
