# Supplementary material for: Relocation of earthquakes in the southern and eastern Alps (Austria, Italy) recorded by the dense, temporary SWATH-D network using a Markov chain Monte Carlo inversion
Source: Copernicus journal article supplement (doi:10.5194/se-12-1087-2021), 2021-05-19
Supplement: Supplementary file 2 [file S2.xlsx]

## Sheet: Sheet1
UTC Date	UTC time	Longitude (° E)	Latitude (°N)	Depth (km)	Longitude uncertainty (km)	Latitude uncertainty (km)	Depth uncertainty (km)	Magnitude	Magnitude source
2017-09-03	09:15:46	10.6603	45.6917	17.54	0.387	0.562	0.506	3.4	ZAMG
2017-09-04	05:46:19	13.1979	46.4314	8.66	0.499	0.454	2.046	1.2	ZAMG
2017-09-05	03:22:46	10.8031	46.4225	7.79	0.381	0.437	1.797	2	SED
2017-09-05	22:34:01	12.0289	45.8937	6.77	0.39	0.727	4.297	2.2	ZAMG
2017-09-06	12:22:30	11.965	46.2628	13.7	0.227	0.344	0.673	3.6	ZAMG
2017-09-06	12:30:32	11.9685	46.2595	11.44	0.284	0.425	0.846	3.4	ZAMG
2017-09-09	12:18:54	12.5934	46.2538	4.27	0.59	1.051	2.817	2.1	ZAMG
2017-09-11	20:45:29	13.0632	46.3047	3.7	0.605	0.628	2.491	1.4	ZAMG
2017-09-19	00:12:49	12.9675	46.4028	7.8	0.456	0.42	1.385	1.4	ZAMG
2017-09-25	09:29:58	12.9191	46.2196	-1.45	0.46	0.771	1.477	1.6	ZAMG
2017-09-25	16:51:44	10.7957	45.8969	3.92	0.49	0.582	2.057	2	ZAMG
2017-09-26	19:14:40	13.7483	46.2614	-2.53	0.356	0.483	2.24	2.5	ZAMG
2017-09-28	14:49:07	11.2733	47.137	11.02	0.329	0.423	1.503	2.4	ZAMG
2017-09-29	02:10:06	10.6468	47.2299	8.41	0.578	0.699	3.859	1.4	SED
2017-09-29	02:18:52	10.7283	45.9086	7.86	0.313	0.372	1.556	1.9	ZAMG
2017-09-29	05:47:39	12.9628	46.3784	13.32	0.296	0.307	0.739	2.3	ZAMG
2017-09-30	05:01:50	10.6184	45.8654	4.06	0.444	0.563	2.944	1.8	ZAMG
2017-10-08	18:48:22	12.1497	46.7657	10.39	0.146	0.21	0.592	2.6	ZAMG
2017-10-08	20:51:36	11.3758	47.3414	14.18	0.469	0.617	1.307	1.8	ZAMG
2017-10-11	00:41:09	10.5749	46.0459	3.2	0.368	0.429	2.127	1.1	INGV
2017-10-14	03:20:43	12.3578	46.1393	5.84	0.504	0.661	3.178	1.4	ZAMG
2017-10-19	15:47:48	11.0626	45.7431	7.87	0.507	0.526	1.28	1.7	ZAMG
2017-10-22	02:03:10	13.0217	46.3883	9.16	0.363	0.359	1.053	1.7	ZAMG
2017-10-29	12:02:01	11.1237	47.1123	13.3	0.203	0.272	0.859	2.6	ZAMG
2017-10-31	04:59:04	10.9216	45.8374	12.75	0.204	0.32	0.437	3.1	ZAMG
2017-11-01	17:02:48	13.2807	46.9904	7.04	0.262	0.363	1.291	1.5	ZAMG
2017-11-01	18:27:06	13.2838	46.99	6.25	0.332	0.424	1.411	1	ZAMG
2017-11-01	21:52:39	13.2776	46.9931	8.6	0.208	0.28	1.068	2.1	ZAMG
2017-11-03	18:15:40	11.3737	47.1569	14.51	0.148	0.212	0.436	3.8	ZAMG
2017-11-03	18:19:38	11.3692	47.1506	7.76	0.348	0.424	1.741	2	ZAMG
2017-11-03	18:21:08	11.3691	47.1539	10.71	0.36	0.432	1.582	2	ZAMG
2017-11-03	18:34:58	11.3705	47.1553	11.34	0.465	0.525	2.164	1.5	ZAMG
2017-11-03	18:47:48	11.3763	47.1539	12.61	0.176	0.255	0.595	2.9	ZAMG
2017-11-03	20:24:57	11.3687	47.1538	9.53	0.302	0.41	1.473	2.1	ZAMG
2017-11-04	04:15:41	11.3488	47.1559	18.38	0.712	0.628	1.664	1.4	ZAMG
2017-11-04	07:39:20	10.1247	46.3295	6.45	0.477	0.541	2.001	1.1	SED
2017-11-04	14:32:01	11.3651	47.149	8.94	0.513	0.602	2.837	1.7	ZAMG
2017-11-09	10:14:16	11.3927	47.1377	6.83	0.246	0.311	1.017	2.2	ZAMG
2017-11-10	01:33:56	11.4347	47.3497	6.53	0.262	0.412	1.27	2.4	ZAMG
2017-11-12	19:17:36	10.9893	45.817	11.44	0.29	0.382	0.94	2	ZAMG
2017-11-16	06:23:06	11.2904	47.2872	7.78	0.587	0.935	2.957	1.5	ZAMG
2017-11-16	22:50:22	12.8925	46.3684	-3.13	0.232	0.248	0.689	2.1	ZAMG
2017-11-19	03:41:23	10.7196	46.5414	7.77	0.243	0.28	1.157	1.6	ZAMG
2017-11-20	23:04:05	11.3794	47.1611	12.35	0.163	0.24	0.61	2.9	ZAMG
2017-11-21	07:53:22	11.3677	47.1477	8.78	0.522	0.566	2.634	1.8	ZAMG
2017-11-21	23:39:55	13.2203	46.4084	13.47	0.216	0.354	1.02	2	ZAMG
2017-11-23	11:41:54	13.7463	46.4461	12.43	0.263	0.275	0.604	2.8	ZAMG
2017-11-23	14:12:05	12.7522	46.1124	2.32	0.446	0.947	3.381	1.4	INGV
2017-11-23	20:43:01	10.3331	46.5865	7.68	0.285	0.303	0.948	2	ZAMG
2017-11-24	07:35:10	12.3543	46.1438	6.97	0.394	0.597	1.712	1.5	ZAMG
2017-11-25	03:19:17	10.9803	45.8328	12.84	0.316	0.378	0.907	1.4	ZAMG
2017-11-25	15:51:35	12.9211	46.3301	8.32	0.44	0.496	1.825	1	ZAMG
2017-11-28	00:28:32	11.0319	45.7761	7.94	0.306	0.418	1.324	1.8	ZAMG
2017-11-28	18:13:15	13.2139	46.4115	14.38	0.261	0.302	0.746	2	ZAMG
2017-12-01	13:55:54	9.8229	46.4757	6.59	0.427	1.039	3.931	1.6	ZAMG
2017-12-13	07:50:56	13.0761	46.2935	1.79	0.32	0.367	1.735	1.7	ZAMG
2017-12-15	15:42:29	11.3983	45.8154	2.11	0.464	0.616	2.343	1.7	ZAMG
2017-12-16	19:23:27	13.1268	46.4644	1	0.327	0.301	1.595	2.1	ZAMG
2017-12-24	03:44:58	11.0399	45.7832	8.81	0.401	0.434	1.407	1.4	ZAMG
2017-12-25	14:40:49	12.9041	46.5108	4.85	0.271	0.254	1.082	1.6	ZAMG
2017-12-27	11:40:18	10.2676	46.3263	9.99	0.33	0.356	0.963	1.9	SED
2017-12-29	08:28:20	11.333	47.1352	11.32	0.392	0.614	2.184	1.6	ZAMG
2017-12-29	20:36:50	12.7057	46.4625	5.37	0.313	0.306	1.546	1.6	ZAMG
2017-12-30	17:22:21	11.7846	45.855	8.36	0.286	0.468	1.06	2.2	ZAMG
2017-12-30	19:22:33	10.2662	46.3254	9.77	0.411	0.419	1.075	1.3	ZAMG
2018-01-04	22:09:49	10.5178	46.7333	6.84	0.237	0.265	1.001	2.1	SED
2018-01-05	14:55:58	12.8161	46.3452	8.18	0.269	0.332	1.426	2.1	ZAMG
2018-01-06	16:44:36	12.4254	47.381	11.03	0.361	0.516	2.507	2	ZAMG
2018-01-07	22:22:11	12.3291	46.566	0.57	0.17	0.244	0.912	2.1	ZAMG
2018-01-08	08:18:49	10.0922	46.9066	10.22	0.288	0.322	1.539	2.7	SED
2018-01-10	21:42:58	11.3055	45.8691	9.77	0.468	0.72	1.78	1.2	ZAMG
2018-01-17	10:22:20	13.5971	46.2882	16.68	0.245	0.284	0.322	4.1	ZAMG
2018-01-17	19:07:19	10.0166	47.1859	-3.11	0.242	0.304	0.658	4.1	SED
2018-01-19	17:39:43	13.0316	46.4113	15.65	0.151	0.203	0.303	4.1	ZAMG
2018-01-19	17:48:36	13.0733	46.4211	12.79	0.259	0.287	0.655	2.1	ZAMG
2018-01-19	21:12:37	14.9155	46.5212	14.7	0.584	1.103	2.238	1.6	ZAMG
2018-01-20	13:52:40	13.5684	46.3138	1.06	0.858	0.58	3.244	1.2	ZAMG
2018-01-21	09:09:41	13.0354	46.4312	17.25	0.31	0.315	0.622	1.6	ZAMG
2018-01-22	00:38:19	10.4038	46.5309	4.72	0.346	0.448	1.143	1.2	SED
2018-01-27	10:02:06	10.8138	45.9415	6.29	0.475	0.662	1.989	1.3	INGV
2018-01-28	12:02:02	12.1448	46.7713	9.77	0.48	0.813	1.446	1.3	ZAMG
2018-01-28	21:06:22	11.6809	47.366	14.02	0.86	1.095	1.455	1.6	ZAMG
2018-01-30	02:13:38	10.8202	45.9465	7.19	0.36	0.458	1.304	1.4	ZAMG
2018-02-01	01:47:32	10.0232	47.1954	7.18	0.274	0.316	0.504	4.1	SED
2018-02-04	18:57:43	10.6188	45.6974	11.7	0.336	0.545	1.064	2.7	SED
2018-02-05	02:04:47	10.2397	46.78	10.76	0.461	0.456	2.435	1.4	SED
2018-02-05	08:01:23	10.7676	46.7275	10.51	0.288	0.384	1.049	2	SED
2018-02-10	01:24:15	11.2828	45.9614	6.38	0.363	0.4	1.538	1.6	ZAMG
2018-02-12	09:00:38	10.6061	46.4167	6.82	0.489	0.723	1.466	1.2	SED
2018-02-15	08:27:53	13.5606	46.3114	-0.48	0.411	0.435	1.917	2.1	ZAMG
2018-02-17	07:47:35	13.5999	46.202	9.51	0.864	0.797	3.119	1.5	ZAMG
2018-02-18	06:14:22	11.1213	47.2822	8.05	0.335	0.41	1.168	2.4	ZAMG
2018-02-20	19:18:18	10.5023	46.5554	10.05	0.243	0.29	0.756	2.5	SED
2018-02-21	21:48:07	12.0815	47.3969	12.57	0.578	1.249	3.177	1.9	ZAMG
2018-02-22	13:49:00	10.6891	47.0595	6.17	0.414	0.419	1.196	2.2	SED
2018-02-23	03:16:41	12.3647	46.5801	2.99	0.232	0.268	1.236	1.9	ZAMG
2018-02-23	04:48:53	10.7459	46.4659	5.82	0.308	0.573	1.38	1.1	SED
2018-02-25	08:16:30	12.5928	46.3563	11.92	0.15	0.207	0.46	4.1	ZAMG
2018-02-25	08:55:39	12.5784	46.3593	5.36	0.346	0.361	1.468	1.9	ZAMG
2018-02-25	09:14:39	12.5884	46.361	6.18	0.533	0.513	1.551	1.8	ZAMG
2018-02-25	11:13:42	14.2935	46.762	13.37	0.515	0.589	1.525	1.4	ZAMG
2018-02-25	13:26:38	12.5799	46.3558	5.59	0.388	0.49	1.653	1.8	ZAMG
2018-02-25	14:36:25	12.5858	46.3547	7.68	0.168	0.242	0.869	2.9	ZAMG
2018-02-25	14:40:46	12.5878	46.3609	5.52	0.201	0.278	1.561	2.6	ZAMG
2018-02-25	14:43:36	12.5878	46.3604	6.17	0.6	0.498	2.574	1	OGS
2018-02-25	15:53:05	12.5943	46.3568	11.81	0.158	0.234	0.462	3.6	ZAMG
2018-02-25	16:42:39	12.5781	46.3561	5.31	0.325	0.397	1.523	1.7	ZAMG
2018-02-25	17:19:59	12.5841	46.356	5.98	0.21	0.29	1.436	2.4	ZAMG
2018-02-25	17:40:14	12.5919	46.3612	10.66	0.18	0.248	0.597	3.1	ZAMG
2018-02-25	20:33:28	12.586	46.3621	5.04	0.301	0.357	1.768	2.1	ZAMG
2018-02-26	01:23:06	12.5834	46.359	6.04	0.225	0.355	1.287	2	ZAMG
2018-02-26	03:29:28	10.7927	46.336	4.62	0.261	0.259	1.485	1.9	SED
2018-02-26	13:31:36	11.4253	47.2992	5.95	0.288	0.517	1.356	2.8	ZAMG
2018-02-26	15:42:27	10.7455	46.4682	7.1	0.227	0.303	1.079	2.2	SED
2018-02-26	22:06:39	12.5812	46.3609	5.67	0.304	0.375	1.367	1.9	ZAMG
2018-02-26	23:26:50	12.5846	46.3637	4.68	0.335	0.43	1.522	1.3	ZAMG
2018-02-27	15:49:52	12.5819	46.3592	5.6	0.382	0.437	1.568	1.5	ZAMG
2018-02-28	21:52:34	12.5886	46.3629	5.26	0.293	0.35	1.512	1.8	ZAMG
2018-03-04	19:31:07	11.5105	45.663	19.11	0.344	0.522	0.645	2.4	ZAMG
2018-03-05	02:44:04	11.4286	47.3697	13.9	0.521	0.978	1.295	1.6	ZAMG
2018-03-09	01:48:09	10.4277	46.7722	5.04	0.605	0.51	3.262	1.1	ZAMG
2018-03-16	00:07:06	10.9551	45.6997	10.54	0.575	0.774	1.23	1.7	ZAMG
2018-03-16	22:29:04	12.5896	46.3625	5.67	0.542	0.563	2.12	1	ZAMG
2018-03-30	00:11:29	11.2544	46.9081	13.14	0.19	0.247	0.549	2.9	ZAMG
2018-04-06	17:14:21	12.5827	46.3557	5.11	0.247	0.319	1.296	2.3	INGV
2018-04-08	18:39:25	13.5196	46.3033	12.73	0.37	0.443	1.334	1.8	INGV
2018-04-08	21:22:46	12.5845	46.355	5.02	0.518	0.43	1.91	1.4	INGV
2018-04-09	02:30:13	12.6053	46.3149	3.9	0.694	0.53	3.445	1.1	INGV
2018-04-09	16:31:03	12.3436	46.1463	8.69	0.409	0.563	1.309	2.7	INGV
2018-04-10	02:40:05	12.5836	46.3662	7.26	0.206	0.279	1.189	2.6	INGV
2018-04-10	21:49:48	9.1362	47.6097	15.79	0.778	0.708	2.246	2.3	INGV
2018-04-11	22:43:36	14.0416	46.7629	9.61	0.376	0.36	0.99	1.6	INGV
2018-04-11	23:14:21	13.5838	46.761	11.11	0.465	0.675	1.311	1.1	INGV
2018-04-12	02:23:58	10.0661	47.2093	25.05	0.337	0.363	0.315	3.2	INGV
2018-04-12	02:23:59	10.02	47.178	3.3	0.295	0.326	1.443	3.2	INGV
2018-04-16	00:39:31	10.462	46.6825	11.18	0.503	0.553	1.767	1.3	INGV
2018-04-16	09:47:16	13.0418	46.4373	10.46	0.578	0.581	1.26	1.3	INGV
2018-04-17	05:38:35	10.5679	45.8593	11.08	0.273	0.34	0.648	3	INGV
2018-04-19	07:53:28	12.1493	46.2367	3.63	0.447	0.522	2.798	1.8	INGV
2018-04-19	20:11:50	14.1742	46.7531	11.79	0.485	0.582	1.244	1.4	INGV
2018-04-24	02:32:56	10.7473	46.4702	6.2	0.335	0.423	1.278	1.4	INGV
2018-04-25	13:55:49	10.5022	46.6474	11.49	0.816	0.863	1.414	1.5	INGV
2018-04-25	17:22:09	10.5043	46.6536	10.38	0.397	0.4	1.06	2.1	INGV
2018-04-25	17:24:37	10.494	46.6479	11.34	0.818	0.621	1.546	1.1	INGV
2018-04-25	17:28:24	10.498	46.6522	11.46	0.501	0.611	1.136	1.5	INGV
2018-04-25	17:29:33	10.4953	46.6546	10.24	0.295	0.323	0.841	2.7	INGV
2018-04-25	18:12:19	10.5	46.6534	11.53	0.505	0.625	1.382	1.7	INGV
2018-04-26	03:29:03	10.9977	45.7916	11.99	0.556	0.487	1.314	1.2	INGV
2018-04-27	01:56:59	10.5012	46.6545	12	0.479	0.459	1.11	1.7	INGV
2018-04-30	00:00:56	14.5527	45.8899	10.82	0.812	0.688	1.771	1.8	INGV
2018-04-30	18:58:30	14.3936	47.1857	10.49	0.646	0.795	4.245	2	INGV
2018-05-03	21:04:29	10.4499	46.5047	6.83	0.427	0.589	1.081	1.6	INGV
2018-05-04	00:11:54	11.3791	45.8018	13.53	0.715	0.994	1.779	1.5	INGV
2018-05-05	02:41:14	10.7428	45.9408	7.21	0.433	0.683	1.526	1.6	INGV
2018-05-08	08:25:08	12.8699	46.3038	1.14	0.517	0.455	2.538	1.5	INGV
2018-05-09	04:34:09	12.919	46.3026	5.68	0.538	0.568	3.318	1	OGS
2018-05-09	21:27:43	13.1097	46.2832	-0.23	0.381	0.421	2.352	1.6	INGV
2018-05-09	21:48:02	13.1048	46.2727	5.79	0.417	0.355	6.095	3.9	INGV
2018-05-11	23:52:42	11.37	47.1494	9.24	0.566	0.515	2.659	1.6	INGV
2018-05-12	22:58:03	12.8759	46.3381	5.94	0.475	0.536	2.616	1.4	INGV
2018-05-13	16:55:36	14.6371	47.2437	13.25	0.484	0.537	3.855	2.4	INGV
2018-05-13	23:08:18	9.9027	46.36	13.79	0.451	0.664	2.617	1.6	INGV
2018-05-15	01:11:37	12.6756	46.3277	10.54	0.389	0.516	1.154	2.2	INGV
2018-05-15	04:58:05	13.0227	46.431	9.9	0.413	0.402	1.029	1.5	INGV
2018-05-17	21:21:39	12.8595	46.4593	2.63	0.513	0.42	2.172	1.1	INGV
2018-05-18	22:30:54	13.4754	46.3054	7.8	0.554	0.519	6.239	1.2	INGV
2018-05-18	22:45:34	13.4773	46.3067	6.83	0.575	0.542	4.854	1	INGV
2018-05-18	23:03:34	10.7121	47.2938	6.88	0.57	0.691	3.743	1.6	INGV
2018-05-20	04:40:38	12.4052	46.7389	10.06	0.446	0.584	1.262	1.2	INGV
2018-05-22	20:12:24	12.187	46.0249	5.95	0.673	0.877	4.051	1.4	INGV
2018-05-24	07:20:14	14.4422	46.0283	13.54	0.734	0.832	1.476	1.9	INGV
2018-05-25	01:52:20	9.9067	46.6515	12.51	0.396	0.522	1.823	1.7	INGV
2018-05-25	07:32:08	10.636	46.3841	8.98	0.596	0.522	1.591	1.4	OGS
2018-05-26	14:41:17	10.8487	45.7822	4.97	0.687	0.697	3.182	1.8	INGV
2018-05-26	22:52:23	13.498	46.3088	0.69	0.493	0.424	2.234	1	INGV
2018-05-30	13:28:24	12.0038	46.8036	11.37	0.468	0.664	1.474	1.6	INGV
2018-05-31	15:17:21	12.0051	46.8006	11.68	0.568	0.942	1.692	1.4	INGV
2018-06-01	19:01:11	11.7852	47.3664	13.89	0.799	0.939	1.905	1.8	INGV
2018-06-02	23:25:22	10.1537	46.7586	9.84	0.464	0.451	2.024	1.7	INGV
2018-06-04	00:21:16	13.7745	46.4344	-1.82	0.273	0.275	1.258	2.3	INGV
2018-06-04	13:12:33	11.7529	45.7912	9.47	0.615	1.308	2.37	1.6	INGV
2018-06-04	18:37:15	13.711	46.7992	7.07	0.338	0.351	0.995	1.6	INGV
2018-06-05	04:13:14	13.0833	46.4246	13.66	0.255	0.296	0.654	2.3	INGV
2018-06-07	18:42:18	13.684	46.2226	5.35	0.466	0.804	4.325	1.6	INGV
2018-06-08	10:04:18	11.3011	45.8304	9.13	0.452	0.555	1.285	1.9	INGV
2018-06-09	08:04:56	12.5861	46.358	5.69	0.471	0.445	1.962	1.3	INGV
2018-06-09	08:18:45	10.1767	46.7972	12.11	0.618	0.448	2.379	1.9	INGV
2018-06-11	13:13:50	14.3274	46.1837	7.17	0.719	0.771	2.949	1.3	INGV
2018-06-11	18:36:00	11.8463	45.9245	4.79	0.497	0.696	1.395	2.3	INGV
2018-06-13	06:27:06	10.5021	46.6538	11.41	0.455	0.525	0.99	2.1	INGV
2018-06-16	03:35:36	13.1939	46.2828	6.16	0.448	0.486	2.202	1.3	INGV
2018-06-17	21:39:26	11.6126	47.2777	16.47	0.336	0.468	0.847	2.7	INGV
2018-06-30	05:46:48	12.583	46.2639	2.94	0.339	0.455	2.07	2.2	INGV
2018-06-30	05:46:48	12.583	46.2639	2.88	0.339	0.455	2.07	2.2	INGV
2018-06-30	16:45:18	13.357	46.2261	3.62	0.602	0.87	3.25	1	OGS
2018-07-02	05:20:59	10.9665	46.4737	10.4	0.531	1.119	1.265	1.2	INGV
2018-07-02	19:12:08	12.5804	46.2628	6.23	0.34	0.397	2.566	2.3	INGV
2018-07-02	19:14:24	12.5784	46.2629	3.09	0.21	0.339	1.551	2.6	INGV
2018-07-02	19:42:29	12.5756	46.2638	5.01	0.301	0.409	1.962	2	INGV
2018-07-03	22:36:50	13.8598	46.5176	6.5	0.761	0.651	2.954	1	INGV
2018-07-05	19:31:54	11.8688	47.3564	14.22	0.821	1.123	2.84	2.2	INGV
2018-07-06	13:16:49	11.2975	46.4843	15.31	0.441	0.509	1.018	1.6	INGV
2018-07-08	14:00:49	10.4995	46.6536	11.77	0.425	0.419	0.808	2.1	SED
2018-07-09	03:00:07	14.1435	46.6957	12.1	0.517	0.657	1.199	1.4	INGV
2018-07-11	18:46:24	11.3338	47.2928	15.99	0.767	0.63	1.694	1.8	INGV
2018-07-12	22:08:14	14.4175	47.1047	11.34	0.448	0.536	2.612	1.9	INGV
2018-07-13	17:21:01	10.8882	46.4171	6.23	0.523	0.627	1.605	1.4	INGV
2018-07-15	03:04:57	10.7134	45.6337	9.18	0.732	1.029	2.447	1.6	INGV
2018-07-17	12:39:19	11.0273	45.8336	12.67	0.798	0.64	1.164	1.5	INGV
2018-07-17	22:42:37	12.9723	46.4577	4.64	0.384	0.334	1.282	1.1	INGV
2018-07-18	01:24:07	13.1078	46.2868	-1.22	0.295	0.345	1.866	1.7	INGV
2018-07-19	13:29:07	11.1538	45.8103	12.74	0.809	0.67	1.402	1.4	INGV
2018-07-22	02:32:40	13.2313	46.2482	6.17	0.665	0.912	2.189	1.2	INGV
2018-07-24	19:49:26	10.8589	46.3921	5.12	0.3	0.341	1.43	1.5	INGV
2018-07-28	01:43:30	9.455	46.6549	11.48	0.653	0.515	2.572	2	SED
2018-07-29	02:27:53	11.0252	45.7692	10.61	0.682	0.676	1.405	1.5	INGV
2018-07-29	15:11:24	11.6008	47.3453	8.15	0.714	0.861	1.263	1.8	INGV
2018-07-30	02:04:02	14.7149	46.925	14.98	0.627	0.661	1.872	1.6	INGV
2018-07-30	09:04:25	13.2918	46.2374	6.02	0.697	0.99	1.355	1.3	INGV
2018-07-30	12:50:57	10.7186	45.8091	10.77	0.69	0.757	3.274	1.8	INGV
2018-08-01	01:32:35	11.2309	46.8123	11.41	0.317	0.343	0.935	1.7	INGV
2018-08-02	07:46:24	10.7146	46.0027	7.39	0.431	0.534	1.268	1.7	INGV
2018-08-02	08:51:34	11.9771	46.2563	4.79	0.277	0.335	1.306	1.8	INGV
2018-08-05	03:44:10	10.1572	46.3728	12.43	0.521	0.668	1.212	1	SED
2018-08-06	23:27:50	13.2601	46.2938	11.72	0.514	0.661	1.371	1.5	INGV
2018-08-08	21:17:13	12.5862	46.3601	6.8	0.46	0.445	1.514	1.2	INGV
2018-08-10	08:24:06	11.9778	46.2612	6.19	0.4	0.433	2.556	1.4	INGV
2018-08-10	17:04:18	13.0279	46.322	7.05	0.567	0.506	2.188	1.5	INGV
2018-08-11	03:26:59	13.028	46.3113	11.75	0.239	0.307	0.785	3.1	INGV
2018-08-11	03:30:39	13.0362	46.3103	14.49	0.196	0.284	0.428	4.2	INGV
2018-08-11	03:38:03	13.0323	46.3285	8.16	0.282	0.33	1.714	2.4	INGV
2018-08-11	03:51:27	13.0252	46.3207	5.75	0.743	0.742	3.586	1.5	INGV
2018-08-11	03:53:14	13.0276	46.3196	4.63	0.526	0.651	3.011	1.8	INGV
2018-08-11	03:54:58	13.0283	46.3195	2.3	0.617	0.517	6.231	3	INGV
2018-08-11	04:52:11	13.0316	46.3164	-0.18	0.285	0.343	0.752	2.7	INGV
2018-08-12	01:48:31	13.0349	46.3278	6.57	0.534	0.451	2.066	1	INGV
2018-08-12	12:57:50	13.0334	46.3235	6.95	0.472	0.458	1.632	1.2	INGV
2018-08-13	02:38:37	13.0278	46.3521	7.18	0.403	0.488	2.257	1.4	INGV
2018-08-13	06:34:11	12.4281	46.1313	10.01	0.567	1.02	1.701	1.2	INGV
2018-08-13	19:46:06	11.0314	45.8513	9.91	0.351	0.516	1.021	1.8	SED
2018-08-15	08:56:17	11.0017	45.8402	13.32	0.322	0.441	0.885	2.2	INGV
2018-08-15	09:27:23	11.2575	45.7296	13.41	0.265	0.463	0.857	2.3	INGV
2018-08-16	09:45:10	10.1039	46.8385	6.87	0.289	0.28	1.337	2.8	SED
2018-08-19	19:18:47	13.0345	46.3212	8.08	0.406	0.396	1.145	1.4	INGV
2018-08-20	07:56:57	13.7988	46.6541	0.5	0.819	0.918	2.488	1.1	INGV
2018-08-26	01:22:14	10.8506	46.5287	6.96	0.265	0.349	1.247	1.1	SED
2018-08-29	20:23:50	12.5893	46.3585	7.03	0.355	0.48	1.448	1	INGV
2018-08-30	15:56:06	10.7072	45.6452	18.27	0.493	0.885	1.259	1.8	SED
2018-09-04	02:06:15	12.3843	46.0911	-1.62	0.419	0.518	1.688	1.2	INGV
2018-09-04	21:02:40	10.8323	47.3115	8.22	0.626	0.836	4.861	1.2	INGV
2018-09-06	01:50:52	11.2877	45.8303	9.09	0.345	0.464	0.977	1.5	INGV
2018-09-06	01:58:00	11.2782	45.8256	12.03	0.549	0.622	1.288	1	INGV
2018-09-06	04:01:41	13.1422	46.4308	13.29	0.34	0.323	1.573	1.9	INGV
2018-09-06	22:58:10	14.3003	46.1171	11.6	0.621	0.701	3.111	1.8	INGV
2018-09-09	21:06:08	12.4021	46.4973	1.42	0.231	0.238	0.949	1.8	INGV
2018-09-10	07:43:57	11.3191	46.1158	7.42	0.248	0.266	1.074	2.5	INGV
2018-09-12	18:14:23	11.0304	47.3595	4.96	0.266	0.353	0.931	2.7	SED
2018-09-13	08:47:14	9.8231	46.5727	11.66	0.354	0.436	1.268	2.6	SED
2018-09-17	21:38:42	11.0904	45.8485	6.66	0.426	0.438	1.258	1.5	INGV
2018-09-19	13:47:53	9.7656	46.5038	14.96	0.585	0.746	2.11	1.7	SED
2018-09-19	15:55:29	9.7678	46.5087	13.55	0.383	0.544	1.722	2	SED
2018-09-19	21:21:42	10.0985	46.8651	1.87	0.868	0.739	4.648	1.2	INGV
2018-09-19	22:29:51	11.1802	45.9509	11.97	0.48	0.524	1.375	1.1	INGV
2018-09-20	03:41:51	10.1917	46.7881	11.72	0.446	0.6	1.878	1.6	SED
2018-09-21	10:29:57	11.9781	46.2619	5.92	0.328	0.333	1.062	2.1	INGV
2018-09-21	20:58:59	12.5914	46.3672	5.92	0.205	0.276	1.245	2.1	INGV
2018-09-21	21:00:54	12.5895	46.3656	5.51	0.242	0.34	1.023	1.7	INGV
2018-09-21	22:59:00	9.966	46.5384	14.58	0.56	0.642	1.431	1.5	SED
2018-09-21	23:27:30	9.9615	46.5406	12.64	0.63	1.051	2.236	1	SED
2018-09-23	23:26:17	13.1399	46.4343	12.68	0.289	0.307	0.61	2	INGV
2018-09-25	03:24:29	10.8579	46.3582	7.81	0.268	0.312	1.218	1.2	SED
2018-09-25	22:20:37	12.7038	46.9061	8.44	0.178	0.228	0.773	2	INGV
2018-09-27	17:43:29	12.6428	46.2874	3.54	0.237	0.394	0.831	2.3	INGV
2018-09-28	21:01:43	12.4585	46.152	1.69	0.45	0.763	2.58	1.4	INGV
2018-09-29	05:35:00	10.6486	46.681	7.88	0.304	0.341	0.855	1.8	SED
2018-10-04	15:52:11	11.1708	46.1451	-0.89	0.541	0.543	1.636	1.1	INGV
2018-10-07	19:50:46	10.7852	46.6806	6.32	0.289	0.351	1.091	1.3	INGV
2018-10-10	01:20:01	10.0119	47.1704	3.71	0.45	0.419	1.835	2.2	INGV
2018-10-12	05:40:40	11.3122	47.2816	15.57	0.178	0.23	0.411	3.4	INGV
2018-10-12	08:10:38	10.6144	46.5443	8.48	0.266	0.302	0.845	2.1	SED
2018-10-13	14:57:18	10.6148	46.5475	8.96	0.313	0.37	1.009	1.8	SED
2018-10-13	18:57:49	13.4013	46.3386	10.85	0.409	0.437	1.199	1.4	INGV
2018-10-17	00:38:51	10.8135	46.3484	4.71	0.359	0.421	1.352	1.1	INGV
2018-10-17	04:02:09	9.9597	46.3203	12.15	0.327	0.523	1.436	1.6	SED
2018-10-17	18:15:13	14.3389	46.1581	12.26	0.621	0.652	4.773	2.2	INGV
2018-10-20	01:25:53	13.9582	46.1743	4.18	0.623	0.694	1.58	1.6	INGV
2018-10-20	22:39:32	13.0089	46.2783	4.55	0.418	0.472	1.504	1.1	INGV
2018-10-23	17:19:19	12.8127	46.4364	7.82	0.37	0.337	1.431	1.1	INGV
2018-10-26	17:09:57	9.5154	47.0625	2.6	0.634	0.638	2.679	1.7	SED
2018-11-04	07:14:48	11.0178	45.553	5.52	0.668	0.845	2.16	1.9	SED
2018-11-04	20:27:19	10.9017	46.5291	6.86	0.213	0.274	0.868	1.7	SED
2018-11-06	19:57:55	13.0114	46.4021	9.45	0.71	0.558	1.354	1	INGV
2018-11-08	02:00:07	13.327	46.2006	8.53	0.458	0.467	1.266	1.4	INGV
2018-11-10	07:59:36	13.2056	46.2795	1.97	0.546	0.949	6.024	3	INGV
2018-11-12	00:09:53	10.7528	46.7692	10.69	0.586	0.601	1.946	1.2	SED
2018-11-13	09:06:30	11.1219	45.7526	8.32	0.379	0.411	1.321	2.2	INGV
2018-11-15	11:30:37	10.7117	47.1654	7.74	0.481	0.459	2.29	1.9	INGV
2018-11-15	18:59:41	12.9125	46.3225	1.19	0.296	0.334	1.556	1.6	INGV
2018-11-16	10:48:53	14.1654	46.0715	15.08	0.841	1.09	5.028	2.7	INGV
2018-11-17	10:50:36	12.5176	46.5226	7.46	0.166	0.234	0.689	3.3	INGV
2018-11-17	10:53:09	12.5189	46.5282	2.13	0.296	0.326	1.235	2.1	INGV
2018-11-17	13:54:56	12.5145	46.5273	1.34	0.417	0.328	1.917	1.7	INGV
2018-11-17	20:15:57	14.3541	46.4578	3.75	0.527	0.53	2.663	1.9	INGV
2018-11-19	14:22:45	13.4173	46.1577	-1.61	0.303	0.408	1.049	2.4	INGV
2018-11-19	14:23:45	13.4285	46.1362	10.2	0.953	0.88	9.194	2.9	INGV
2018-11-19	14:44:49	13.4301	46.1523	4.38	0.609	0.947	7.273	1.6	INGV
2018-11-20	18:17:27	12.3165	46.195	6.92	0.341	0.422	1.438	2.1	INGV
2018-11-20	23:13:41	13.5869	46.6614	5.04	0.364	0.4	1.349	1.2	INGV
2018-11-22	03:22:10	10.9015	46.5248	6.78	0.267	0.355	0.966	1.3	SED
2018-11-22	04:02:50	10.9002	46.5253	6.57	0.276	0.433	1.024	1.1	SED
2018-11-25	09:56:31	12.2506	46.2276	7.98	0.436	0.469	2.253	1.9	INGV
2018-11-26	16:58:57	11.2473	46.9428	11.75	0.554	0.536	1.757	1.3	INGV
2018-11-28	03:31:52	12.7764	46.3156	8.96	0.371	0.453	1.16	1.8	INGV
2018-11-29	16:44:05	12.7824	46.3134	10.32	0.379	0.465	1.068	1.2	INGV
2018-12-01	16:55:37	13.1013	46.3782	10.35	0.508	0.458	1.356	1.3	INGV
2018-12-02	15:01:56	14.8416	47.4373	6.26	0.46	0.715	2.694	2.3	INGV
2018-12-04	05:48:31	13.5606	46.2456	-1.27	0.507	0.476	1.932	1.7	INGV
2018-12-04	23:00:42	10.0286	46.7495	5.32	0.51	0.694	5.348	1.4	SED
2018-12-07	17:34:24	11.126	47.2635	12.38	0.494	0.661	1.367	2	INGV
2018-12-13	09:45:52	11.0788	45.9458	8.5	0.265	0.381	1.123	2.2	SED
2018-12-15	00:38:34	13.0386	46.3202	7.46	0.354	0.37	1.097	1.6	INGV
2018-12-15	22:21:36	10.4999	46.6524	9.38	0.258	0.323	0.842	2.1	SED
2018-12-16	13:06:21	10.6714	47.1094	9.92	0.366	0.401	1.511	1.8	SED
2018-12-18	01:09:52	12.5902	46.1982	17.91	0.277	0.352	0.642	2.1	INGV
2018-12-18	02:58:39	10.4054	46.5732	8.45	0.275	0.317	0.972	2	SED
2018-12-18	15:40:26	12.3043	46.1363	5.01	0.421	0.491	2.966	1.6	INGV
2018-12-22	09:45:24	10.8651	46.3719	4.46	0.44	0.623	2.702	1.3	INGV
2018-12-22	14:04:47	12.3664	46.7491	8.01	0.155	0.208	0.763	2.6	INGV
2018-12-23	07:33:37	11.687	45.7667	0.24	0.312	0.647	1.244	2	INGV
2018-12-23	07:52:30	11.6895	45.762	-0.65	0.238	0.477	0.856	2.6	INGV
2018-12-23	13:25:59	12.3613	46.7496	6.88	0.183	0.246	0.784	2.2	INGV
2018-12-25	22:48:07	11.3749	45.8002	13.99	0.71	0.704	1.385	1.4	INGV
2018-12-27	21:09:41	10.7868	46.678	7.02	0.32	0.552	1.477	1.2	INGV
2018-12-27	22:27:07	10.4132	46.5711	7.85	0.254	0.296	0.972	1.9	SED
2018-12-28	07:57:00	12.3599	46.7493	5.42	0.354	0.611	1.314	1.3	INGV
