# Supplementary material for: Relocation of earthquakes in the southern and eastern Alps (Austria, Italy) recorded by the dense, temporary SWATH-D network using a Markov chain Monte Carlo inversion
Source: Copernicus journal article supplement (doi:10.5194/se-12-1087-2021), 2021-05-19
Supplement: Supplementary file 2 [file se-12-1087-2021-supplement.zip]

Archive with 3 entries (3 files):
- se-12-1087-2021-supplement-title-page.pdf
- S1.xlsx
- S2.xlsx
